# Supplementary material for: Efficient Sequestration and Sensitive Detection of Cd(II) in Food Using a Two-dimensional Imine-linked Covalent Organic Framework: Performance, Modeling, and Mechanism
Source: Research Square preprint supplement (doi:10.21203/rs.3.rs-8696171/v1), 2026-02-10
Supplement: Supplementary file 1 [file 2fb834a8872ba1af6e4469c3.docx]

**Supplementary material**

**Table S1** The formulas employed herein

**Table S2** Kinetic models and parameters of the Cd(II) adsorption on COF-LUZ1

**Table S3** Isotherm models and parameters of Cd(II) adsorption on COF-LUZ1

**Table S1**

| Models | Formulas | Parameters |
| --- | --- | --- |
| Cd(II) adsorption efficiency |  | X: adsorption efficiency, %  C0: initial Cd(II) concentration, mg L-1  Ct: Cd(II) concentration at time t, mg L-1 |
| Cd(II) adsorption capacity |  | qt: adsorption capacity at time t, mg g-1  v: volume of solution, L  m: mass of biochar, g |
| PFO |  | qe: amount of adsorbed Cd(II) at equilibrium, mg kg-1  k1: kinetic rate, min-1 |
| PSO |  | k2: kinetic rate, g mg-1 min-1 |
| Elovich |  | a: constant rate of chemisorption  b: constant coverage of surface |
| LFD |  | Kfd: adsorption constant rate, s-1  F: fractional achievement at equilibrium (F = qt/qe) |
| IPD |  | Ki: constant rate, mg g-1 s0.5  C: boundary layer thickness, mg g-1 |
| Langmuir |  | qm: the maximum adsorption capacity, mg g-1  KL (L mg-1): Langmuir constant |
| Freundlich |  | KF: constant related to adsorption capacity  1/n: constant related to adsorption intensity |
| Temkin |  | aT: an equilibrium bond constant concerned with the maximum energy of the bond  bT: Temkin sorption heat constant; bT =RT  B , R and T are the universal gas constant and temperature (Kelvin) |
| D-R |  | β (mol2 J-2): activity coefficient  ε: Polanyi potential; ε = RTln (1+1/Ce)  E: free energy |
| SSE |  | qexp: actual measured values  qcalc: values determined using kinetic models |
| ARE |  |
| Cd(II) distribution ratio |  | Ci (mg L−1) : the initial ion concentrations in solution  Cf (mg L−1) : the final ion concentrations in solution  V (mL): volume of solution  m (g): mass of absorbent |
| Cd(II) selectivity coefficients |  | |

SSE, sum of squared error; ARE, average relative error.

**Table S2**

| Kinetic models | Parameters | | | |
| --- | --- | --- | --- | --- |
|  | qe,exp |  |  |  |
|  | 1.1182 |  |  |  |
| PFO | qe,cale | K1 | R2 | SSE |
| 1.0894 | 0.3200 | 0.8464 | 0.01577 |
| PSO | qe,cale | K2 | R2 | SSE |
| 1.1278 | 0.6663 | 0.9970 | 0.01138 |
| Elovich | a | b | R2 |  |
| 9.1103 | 25.6303 | 0.8205 |  |
| LFD | Kfd | C | R2 |  |
| 0.04222 | -1.7435 | 0.9128 |  |
| IPD | Ki1 | C1 | R12 |  |
| 0.05778 | 0.7847 | 0.9640 |  |
| Ki2 | C2 | R22 |  |
| 0.00443 | 1.0630 | 0.9372 |  |

**Table S3**

| Isotherm models | Parameters | | | |
| --- | --- | --- | --- | --- |
|  | qexp |  |  |  |
|  | 111.38 |  |  |  |
| Langmuir | qm | KL | R2 | ARE |
| 114.94 | 0.0421 | 0.9994 | 0.03196 |
| Freundlich | 1/n | KF | R2 |  |
| 0.4464 | 5.07 | 0.9070 |  |
| Temkin | at | bt | R2 |  |
| 2.285 | 155.99 | 0.9239 |  |
| D-R | qm | β | R2 | ARE |
| 82.78 | 0.00102 | 0.8568 | 0.2568 |
